# Supplementary material for: Influence of graphene on the electronic and magnetic properties of an iron(iii) porphyrin chloride complex
Source: Royal Society of Chemistry journal article supplement (doi:10.1039/d4cp01551g), 2024-01-01
Supplement: d4cp01551g1.pdf [file d4cp01551g1.pdf]

## Supporting Information for Influence of graphene on the electronic and magnetic properties of an iron(III) porphyrin chloride complex

Young-Joon Song,<sup>1</sup> Charlotte Gallenkamp,<sup>2</sup> Genís Lleopard,<sup>3</sup> Vera Krewald,<sup>2,\*</sup> and Roser Valentí<sup>1,†</sup>

<sup>1</sup>*Institut für Theoretische Physik, Goethe-Universität Frankfurt,  
Max-von-Laue-Str. 1, 60438 Frankfurt am Main, Germany*

<sup>2</sup>*TU Darmstadt, Department of Chemistry, Quantum Chemistry, Peter-Grünberg-Str. 4, 64287 Darmstadt, Germany*

<sup>3</sup>*Departament de Ciència de Materials i Química Física and Institut de Química Teòrica i Computacional (IQTC),  
Universitat de Barcelona, c/ Martí i Franqués 1-11, 08028 Barcelona, Spain*

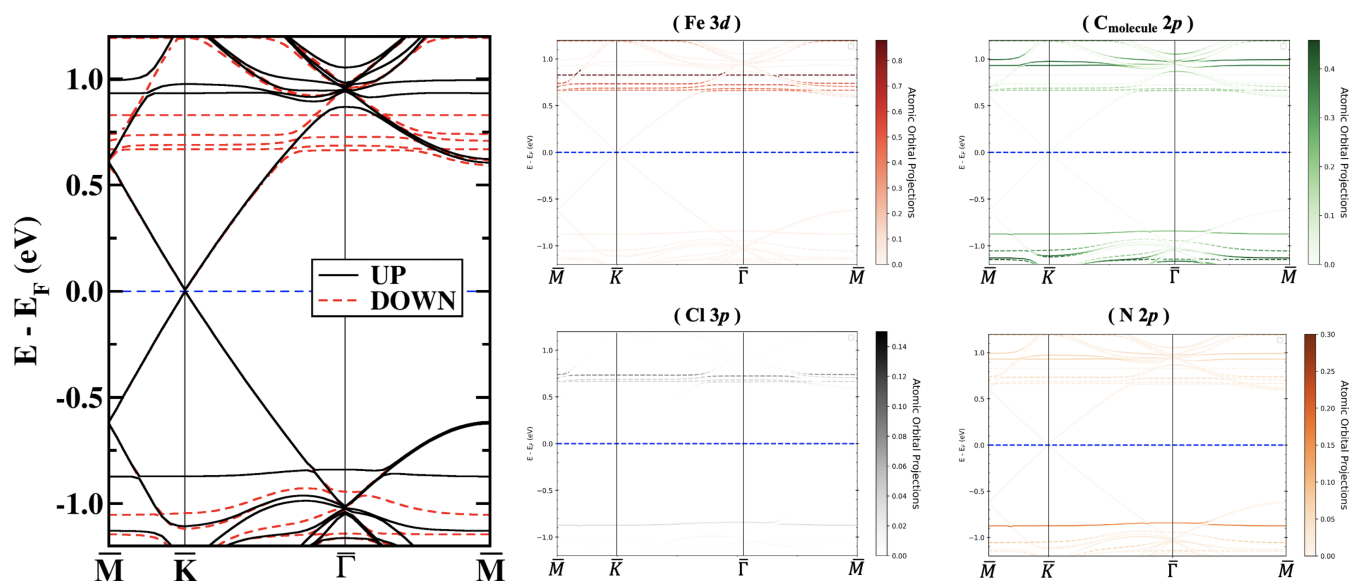

FIG. 1. (Left) Spin-resolved and (middle and right) both spin- and orbital-resolved band structures in  $[\text{Fe}^{\text{III}}(\text{P})(\text{Cl})]$  absorbed on a graphene sheet ( $8 \times 8$ ) within GGA +  $U$  (4 eV). In all plots, solid (dashed) lines represent spin-up (spin-down) bands. The main contribution to forming the Dirac point at the Fermi level stems from C(graphene)  $2p$ , which is shown in the main text.

\* vera.krewald@tu-darmstadt.de

† valenti@itp.uni-frankfurt.de

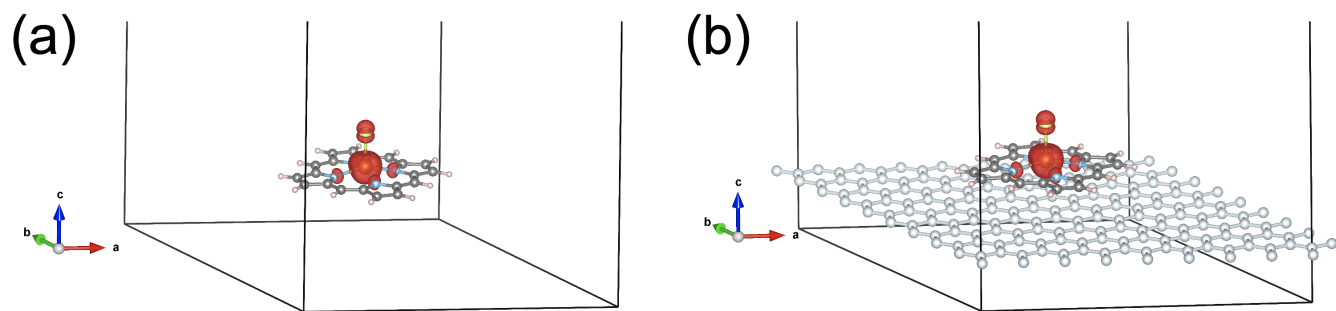

FIG. 2. Spin density plot ( $\rho_{\uparrow} - \rho_{\downarrow}$ ) of (a) [Fe<sup>III</sup>(P)(Cl)] and (b) [Fe<sup>III</sup>(P)(Cl)] adsorbed on a graphene sheet (8×8) within GGA +  $U$  (4 eV) with an isovalue of  $0.067 e/\text{\AA}$ . The spin density plots of both cases are almost similar independent of the existence of graphene, indicating a minimal role of graphene.

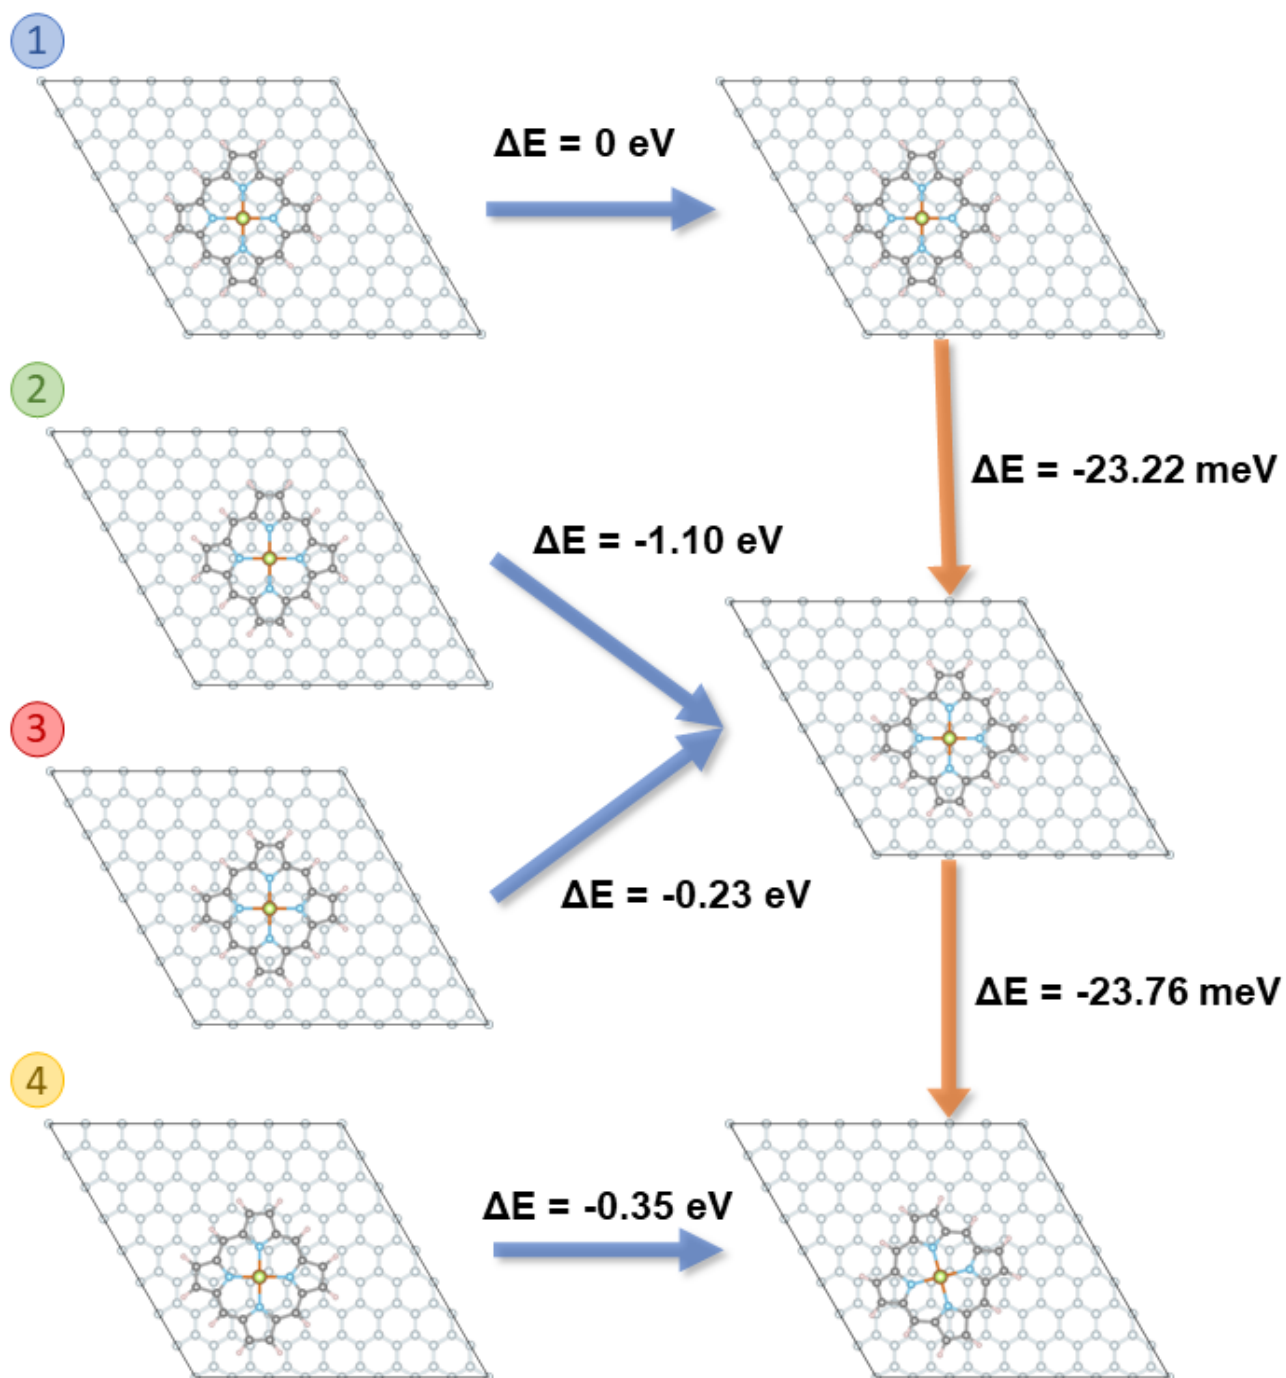

FIG. 3. Structures before (in the left column) and after (in the right column) relaxation with VASP. Blue arrows highlight variations in total energy between the unrelaxed and relaxed structures, while orange arrows denote differences in total energy between two relaxed structures. As a result, the case04 (named bridge2 in the main text) is found to be energetically the most stable.

| Atom | <i>x</i>  | <i>y</i>  | <i>z</i>  |  | Atom | <i>x</i>  | <i>y</i>  | <i>z</i>  |
|------|-----------|-----------|-----------|--|------|-----------|-----------|-----------|
| Fe   | -0.008727 | -0.018712 | -0.027386 |  | H    | -2.807025 | 4.920590  | 0.764329  |
| N    | 2.039261  | -0.038703 | -0.423795 |  | H    | -2.918084 | 6.613482  | 0.199272  |
| N    | 0.018645  | -2.085525 | -0.291067 |  | H    | -1.434104 | 6.035505  | 1.013858  |
| N    | -2.027350 | -0.079449 | -0.558443 |  | H    | 1.142692  | 6.135294  | 1.054967  |
| N    | -0.006855 | 1.965865  | -0.690620 |  | H    | 2.695939  | 6.711881  | 0.380044  |
| H    | 5.258322  | 2.520041  | -0.103633 |  | H    | 2.548809  | 5.036769  | 0.988904  |
| H    | 6.329694  | 1.112051  | -0.219948 |  | C    | 2.866594  | 1.066465  | -0.540529 |
| H    | 5.285019  | -2.436879 | 0.425613  |  | C    | 4.261354  | 0.663259  | -0.499534 |
| H    | 6.341749  | -1.072927 | 0.019912  |  | C    | 5.436649  | 1.584783  | -0.664586 |
| H    | 3.230297  | -3.218110 | -0.085206 |  | C    | 4.269658  | -0.714215 | -0.350769 |
| H    | 1.136046  | -6.341818 | 0.354381  |  | C    | 5.454771  | -1.637094 | -0.317767 |
| H    | 2.503704  | -5.247820 | 0.628502  |  | C    | 2.880382  | -1.133481 | -0.307521 |
| H    | -2.467761 | -5.296082 | 0.427187  |  | C    | 2.452553  | -2.456629 | -0.181559 |
| H    | -1.055603 | -6.359770 | 0.295138  |  | C    | 1.130690  | -2.905653 | -0.192492 |
| H    | -3.176103 | -3.282842 | -0.304438 |  | C    | 0.729065  | -4.298698 | -0.112836 |
| H    | -6.303957 | -1.247590 | -0.918514 |  | C    | 1.669406  | -5.469322 | -0.061595 |
| H    | -5.222178 | -2.650110 | -1.001224 |  | C    | -0.655328 | -4.313684 | -0.164380 |
| H    | -6.317108 | 0.939204  | -1.144815 |  | C    | -1.569199 | -5.506158 | -0.180724 |
| H    | -5.252174 | 2.305824  | -1.519959 |  | C    | -1.080201 | -2.929031 | -0.272717 |
| H    | -3.216763 | 3.093999  | -0.948123 |  | C    | -2.408895 | -2.505552 | -0.344843 |
| H    | -2.482437 | 5.098214  | -1.742792 |  | C    | -2.854273 | -1.188370 | -0.476548 |
| H    | -1.115283 | 6.199207  | -1.493041 |  | C    | -4.248183 | -0.790110 | -0.564417 |
| H    | 1.075649  | 6.207170  | -1.470083 |  | C    | -5.424473 | -1.717230 | -0.444499 |
| H    | 2.485743  | 5.135638  | -1.547798 |  | C    | -4.256295 | 0.587876  | -0.708390 |
| H    | 3.189948  | 3.157312  | -0.747055 |  | C    | -5.442666 | 1.506624  | -0.781002 |
| H    | 5.944713  | 1.012574  | -2.718194 |  | C    | -2.867703 | 1.012174  | -0.702502 |
| H    | 6.594420  | 2.602857  | -2.218403 |  | C    | -2.439769 | 2.335124  | -0.827807 |
| H    | 4.858113  | 2.425058  | -2.607243 |  | C    | -1.117612 | 2.783421  | -0.820540 |
| H    | 4.889825  | -2.867887 | -2.044871 |  | C    | -0.714390 | 4.171741  | -0.957215 |
| H    | 6.624945  | -2.949758 | -1.620923 |  | C    | -1.652964 | 5.340886  | -1.053909 |
| H    | 5.970159  | -1.503011 | -2.444220 |  | C    | 0.670115  | 4.186312  | -0.912289 |
| H    | 1.437054  | -6.103705 | -2.147584 |  | C    | 1.586289  | 5.376204  | -0.952695 |
| H    | 2.930247  | -6.697610 | -1.362115 |  | C    | 1.092877  | 2.806321  | -0.748791 |
| H    | 2.806520  | -4.989608 | -1.876075 |  | C    | 2.421774  | 2.383066  | -0.677298 |
| H    | -2.537881 | -5.076433 | -2.101214 |  | C    | 5.725186  | 1.926615  | -2.139326 |
| H    | -2.678426 | -6.779208 | -1.573367 |  | C    | 5.751916  | -2.277069 | -1.687923 |
| H    | -1.128494 | -6.166191 | -2.223632 |  | C    | 2.244333  | -5.836192 | -1.443668 |
| H    | -4.906452 | -2.556939 | 1.514843  |  | C    | -2.004195 | -5.905364 | -1.604038 |
| H    | -6.627184 | -2.747762 | 1.066698  |  | C    | -5.761194 | -2.064504 | 1.018659  |
| H    | -6.007300 | -1.153390 | 1.591422  |  | C    | -5.783396 | 2.147779  | 0.578480  |
| H    | -6.018392 | 1.373724  | 1.329746  |  | C    | -2.237331 | 5.751486  | 0.311763  |
| H    | -6.658364 | 2.814723  | 0.484857  |  | C    | 2.019075  | 5.842390  | 0.450813  |
| H    | -4.935479 | 2.744545  | 0.958776  |  | Cl   | -0.097459 | 0.204579  | 2.223812  |

TABLE I. Cartesian coordinates (Å) of the relaxed [Fe<sup>III</sup>(OEP)(Cl)] complex in the high spin state at the TPSS/def2-TZVP:def2-SVP level of theory.

| Atom | <i>x</i>  | <i>y</i>  | <i>z</i>  |  | Atom | <i>x</i>  | <i>y</i>  | <i>z</i>  |
|------|-----------|-----------|-----------|--|------|-----------|-----------|-----------|
| Fe   | -0.007323 | -0.018718 | -0.007826 |  | C    | 4.257218  | -0.706805 | -0.352841 |
| N    | 2.038146  | -0.039090 | -0.429355 |  | C    | 2.878673  | -1.134982 | -0.317916 |
| N    | 0.018471  | -2.084489 | -0.294025 |  | C    | 2.456509  | -2.461961 | -0.202286 |
| N    | -2.028194 | -0.076178 | -0.539960 |  | C    | 1.131260  | -2.904443 | -0.198766 |
| N    | -0.008871 | 1.967210  | -0.673518 |  | C    | 0.720997  | -4.285812 | -0.107203 |
| H    | 3.235136  | -3.225119 | -0.120551 |  | C    | -0.651769 | -4.298816 | -0.147407 |
| H    | -3.180521 | -3.285247 | -0.304296 |  | C    | -1.082051 | -2.925356 | -0.262768 |
| H    | -3.222962 | 3.102994  | -0.915146 |  | C    | -2.412960 | -2.507474 | -0.340975 |
| H    | 3.191959  | 3.161897  | -0.745521 |  | C    | -2.852643 | -1.188181 | -0.477382 |
| H    | -1.325078 | -5.156490 | -0.106919 |  | C    | -4.235110 | -0.785976 | -0.587107 |
| H    | 1.407038  | -5.130532 | -0.027158 |  | C    | -4.244523 | 0.581107  | -0.717769 |
| H    | 5.115075  | -1.377890 | -0.287227 |  | C    | -2.867781 | 1.015678  | -0.687330 |
| H    | 5.096650  | 1.342438  | -0.555429 |  | C    | -2.445652 | 2.342500  | -0.802343 |
| H    | 1.339258  | 5.024517  | -1.015375 |  | C    | -1.120112 | 2.784029  | -0.804729 |
| H    | -1.393256 | 4.999250  | -1.087535 |  | C    | -0.708365 | 4.159332  | -0.960824 |
| H    | -5.101101 | 1.247547  | -0.830421 |  | C    | 0.664333  | 4.171983  | -0.924518 |
| H    | -5.082199 | -1.473586 | -0.570505 |  | C    | 1.092490  | 2.804399  | -0.746446 |
| C    | 2.863811  | 1.068460  | -0.533741 |  | C    | 2.423922  | 2.387111  | -0.673466 |
| C    | 4.248017  | 0.659896  | -0.487807 |  | Cl   | -0.071830 | 0.185690  | 2.229841  |

TABLE II. Cartesian coordinates (Å) of the relaxed [Fe<sup>III</sup>(P)(Cl)] complex in the high spin state at the TPSS/def2-TZVP:def2-SVP level of theory.

| Atom | $x$      | $y$      | $z$      | Atom | $x$      | $y$      | $z$      | Atom | $x$      | $y$      | $z$      |
|------|----------|----------|----------|------|----------|----------|----------|------|----------|----------|----------|
| Fe   | 0.416965 | 0.396253 | 0.274903 | C    | 0.250000 | 0.250000 | 0.130769 | C    | 0.208333 | 0.166667 | 0.130769 |
| N    | 0.531945 | 0.426209 | 0.256818 | C    | 0.250000 | 0.375000 | 0.130769 | C    | 0.208333 | 0.291667 | 0.130769 |
| N    | 0.448830 | 0.511718 | 0.257262 | C    | 0.250000 | 0.500000 | 0.130769 | C    | 0.208333 | 0.416667 | 0.130769 |
| N    | 0.301986 | 0.366302 | 0.256820 | C    | 0.250000 | 0.625000 | 0.130769 | C    | 0.208333 | 0.541667 | 0.130769 |
| N    | 0.385105 | 0.280794 | 0.257259 | C    | 0.250000 | 0.750000 | 0.130769 | C    | 0.208333 | 0.666667 | 0.130769 |
| H    | 0.107898 | 0.244178 | 0.253478 | C    | 0.250000 | 0.875000 | 0.130769 | C    | 0.208333 | 0.791667 | 0.130769 |
| H    | 0.150567 | 0.398669 | 0.252731 | C    | 0.375000 | 0.000000 | 0.130769 | C    | 0.208333 | 0.916667 | 0.130769 |
| H    | 0.419822 | 0.665306 | 0.254978 | C    | 0.375000 | 0.125000 | 0.130769 | C    | 0.333333 | 0.041667 | 0.130769 |
| H    | 0.573608 | 0.705341 | 0.255507 | C    | 0.375000 | 0.250000 | 0.130769 | C    | 0.333333 | 0.166667 | 0.130769 |
| H    | 0.726036 | 0.548330 | 0.253480 | C    | 0.375000 | 0.375000 | 0.130769 | C    | 0.333333 | 0.291667 | 0.130769 |
| H    | 0.683362 | 0.393836 | 0.252750 | C    | 0.375000 | 0.500000 | 0.130769 | C    | 0.333333 | 0.416667 | 0.130769 |
| H    | 0.260330 | 0.087172 | 0.255475 | C    | 0.375000 | 0.625000 | 0.130769 | C    | 0.333333 | 0.541667 | 0.130769 |
| H    | 0.414116 | 0.127208 | 0.254958 | C    | 0.375000 | 0.750000 | 0.130769 | C    | 0.333333 | 0.666667 | 0.130769 |
| H    | 0.286281 | 0.530836 | 0.255147 | C    | 0.375000 | 0.875000 | 0.130769 | C    | 0.333333 | 0.791667 | 0.130769 |
| H    | 0.647916 | 0.624946 | 0.256345 | C    | 0.500000 | 0.000000 | 0.130769 | C    | 0.333333 | 0.916667 | 0.130769 |
| H    | 0.547653 | 0.261675 | 0.255158 | C    | 0.500000 | 0.125000 | 0.130769 | C    | 0.458333 | 0.041667 | 0.130769 |
| H    | 0.186018 | 0.167565 | 0.256340 | C    | 0.500000 | 0.250000 | 0.130769 | C    | 0.458333 | 0.166667 | 0.130769 |
| Cl   | 0.416964 | 0.396250 | 0.359825 | C    | 0.500000 | 0.375000 | 0.130769 | C    | 0.458333 | 0.291667 | 0.130769 |
| C    | 0.317779 | 0.498368 | 0.256070 | C    | 0.500000 | 0.500000 | 0.130769 | C    | 0.458333 | 0.416667 | 0.130769 |
| C    | 0.592239 | 0.569812 | 0.256915 | C    | 0.500000 | 0.625000 | 0.130769 | C    | 0.458333 | 0.541667 | 0.130769 |
| C    | 0.516156 | 0.294143 | 0.256076 | C    | 0.500000 | 0.750000 | 0.130769 | C    | 0.458333 | 0.666667 | 0.130769 |
| C    | 0.241696 | 0.222698 | 0.256912 | C    | 0.500000 | 0.875000 | 0.130769 | C    | 0.458333 | 0.791667 | 0.130769 |
| C    | 0.238015 | 0.291593 | 0.256418 | C    | 0.625000 | 0.000000 | 0.130769 | C    | 0.458333 | 0.916667 | 0.130769 |
| C    | 0.272581 | 0.416786 | 0.255880 | C    | 0.625000 | 0.125000 | 0.130769 | C    | 0.583333 | 0.041667 | 0.130769 |
| C    | 0.399475 | 0.542419 | 0.256739 | C    | 0.625000 | 0.250000 | 0.130769 | C    | 0.583333 | 0.166667 | 0.130769 |
| C    | 0.524109 | 0.574877 | 0.257143 | C    | 0.625000 | 0.375000 | 0.130769 | C    | 0.583333 | 0.291667 | 0.130769 |
| C    | 0.309825 | 0.217634 | 0.257134 | C    | 0.625000 | 0.500000 | 0.130769 | C    | 0.583333 | 0.416667 | 0.130769 |
| C    | 0.434459 | 0.250094 | 0.256736 | C    | 0.625000 | 0.625000 | 0.130769 | C    | 0.583333 | 0.541667 | 0.130769 |
| C    | 0.561350 | 0.375724 | 0.255886 | C    | 0.625000 | 0.750000 | 0.130769 | C    | 0.583333 | 0.666667 | 0.130769 |
| C    | 0.595918 | 0.500918 | 0.256416 | C    | 0.625000 | 0.875000 | 0.130769 | C    | 0.583333 | 0.791667 | 0.130769 |
| C    | 0.166577 | 0.295085 | 0.254748 | C    | 0.750000 | 0.000000 | 0.130769 | C    | 0.583333 | 0.916667 | 0.130769 |
| C    | 0.188033 | 0.372759 | 0.254381 | C    | 0.750000 | 0.125000 | 0.130769 | C    | 0.708333 | 0.041667 | 0.130769 |
| C    | 0.444720 | 0.626925 | 0.256131 | C    | 0.750000 | 0.250000 | 0.130769 | C    | 0.708333 | 0.166667 | 0.130769 |
| C    | 0.522060 | 0.647056 | 0.256446 | C    | 0.750000 | 0.375000 | 0.130769 | C    | 0.708333 | 0.291667 | 0.130769 |
| C    | 0.667355 | 0.497424 | 0.254750 | C    | 0.750000 | 0.500000 | 0.130769 | C    | 0.708333 | 0.416667 | 0.130769 |
| C    | 0.645899 | 0.419750 | 0.254391 | C    | 0.750000 | 0.625000 | 0.130769 | C    | 0.708333 | 0.541667 | 0.130769 |
| C    | 0.311877 | 0.145457 | 0.256425 | C    | 0.750000 | 0.750000 | 0.130769 | C    | 0.708333 | 0.666667 | 0.130769 |
| C    | 0.389217 | 0.165588 | 0.256117 | C    | 0.750000 | 0.875000 | 0.130769 | C    | 0.708333 | 0.791667 | 0.130769 |
| C    | 0.000000 | 0.000000 | 0.130769 | C    | 0.875000 | 0.000000 | 0.130769 | C    | 0.708333 | 0.916667 | 0.130769 |
| C    | 0.000000 | 0.125000 | 0.130769 | C    | 0.875000 | 0.125000 | 0.130769 | C    | 0.833333 | 0.041667 | 0.130769 |
| C    | 0.000000 | 0.250000 | 0.130769 | C    | 0.875000 | 0.250000 | 0.130769 | C    | 0.833333 | 0.166667 | 0.130769 |
| C    | 0.000000 | 0.375000 | 0.130769 | C    | 0.875000 | 0.375000 | 0.130769 | C    | 0.833333 | 0.291667 | 0.130769 |
| C    | 0.000000 | 0.500000 | 0.130769 | C    | 0.875000 | 0.500000 | 0.130769 | C    | 0.833333 | 0.416667 | 0.130769 |
| C    | 0.000000 | 0.625000 | 0.130769 | C    | 0.875000 | 0.625000 | 0.130769 | C    | 0.833333 | 0.541667 | 0.130769 |
| C    | 0.000000 | 0.750000 | 0.130769 | C    | 0.875000 | 0.750000 | 0.130769 | C    | 0.833333 | 0.666667 | 0.130769 |
| C    | 0.000000 | 0.875000 | 0.130769 | C    | 0.875000 | 0.875000 | 0.130769 | C    | 0.833333 | 0.791667 | 0.130769 |
| C    | 0.125000 | 0.000000 | 0.130769 | C    | 0.083333 | 0.041667 | 0.130769 | C    | 0.833333 | 0.916667 | 0.130769 |
| C    | 0.125000 | 0.125000 | 0.130769 | C    | 0.083333 | 0.166667 | 0.130769 | C    | 0.958333 | 0.041667 | 0.130769 |
| C    | 0.125000 | 0.250000 | 0.130769 | C    | 0.083333 | 0.291667 | 0.130769 | C    | 0.958333 | 0.166667 | 0.130769 |
| C    | 0.125000 | 0.375000 | 0.130769 | C    | 0.083333 | 0.416667 | 0.130769 | C    | 0.958333 | 0.291667 | 0.130769 |
| C    | 0.125000 | 0.500000 | 0.130769 | C    | 0.083333 | 0.541667 | 0.130769 | C    | 0.958333 | 0.416667 | 0.130769 |
| C    | 0.125000 | 0.625000 | 0.130769 | C    | 0.083333 | 0.666667 | 0.130769 | C    | 0.958333 | 0.541667 | 0.130769 |
| C    | 0.125000 | 0.750000 | 0.130769 | C    | 0.083333 | 0.791667 | 0.130769 | C    | 0.958333 | 0.666667 | 0.130769 |
| C    | 0.125000 | 0.875000 | 0.130769 | C    | 0.083333 | 0.916667 | 0.130769 | C    | 0.958333 | 0.791667 | 0.130769 |
| C    | 0.250000 | 0.000000 | 0.130769 | C    | 0.208333 | 0.041667 | 0.130769 | C    | 0.958333 | 0.916667 | 0.130769 |
| C    | 0.250000 | 0.125000 | 0.130769 |      |          |          |          |      |          |          |          |

TABLE III. Fractional coordinates of the relaxed  $[\text{Fe}^{\text{III}}(\text{P})(\text{Cl})]$  complex absorbed graphene (named bridge 2 in the main text) within GGA +  $U$  ( $U = 4$  eV) with the lattice parameters of  $a_H = 19.68$  Å and  $c_H = 26$  Å in VASP. Here  $H$  denotes the hexagonal unit cell with  $\vec{a}_1 = a_H(1,0,0)$ ,  $\vec{a}_2 = a_H(-\frac{1}{2}, \frac{\sqrt{3}}{2}, 0)$ , and  $\vec{a}_3 = c_H(0,0,1)$ .

| INCAR tags       |  |                     |                   |               |
|------------------|--|---------------------|-------------------|---------------|
| ISTART= 0        |  | EDIFF= 1.0E-6       | BMIX_MAG= 0.00001 | SIGMA= 0.05   |
| ICHARG= 2        |  | ISPIN= 2            | LDAU= .TRUE.      | IVDW = 1      |
| INIWAV= 1        |  | MAGMOM= 5.0 165*0.0 | LDAUTYPE= 1       | BMIX= 0.00001 |
| ENCUT= 500.00 eV |  | LORBIT= 11          | LDAUL= 2 10*-1    | AMIX_MAG= 0.8 |
| PREC= Accurate   |  | ISYM= 2             | LDAUU= 4.0 10*0.0 | LDAUPRINT = 2 |
| ISMear= 0        |  | AMIX= 0.2           | LDAUJ= 1.0 10*0.0 | LMAXMIX= 4    |

TABLE IV. Details of INCAR tags used in the VASP calculations. INCAR is one of the vital input files in VASP.
